# Supplementary material
Source: MDPI journal article supplement (https://www.mdpi.com/2073-4360/6/3/634)

## Supporting Information

**Figure S1.** The release profile of DOX-loaded star-shaped FOL-PEG-PCL micelle at pH 5.4 and 7.

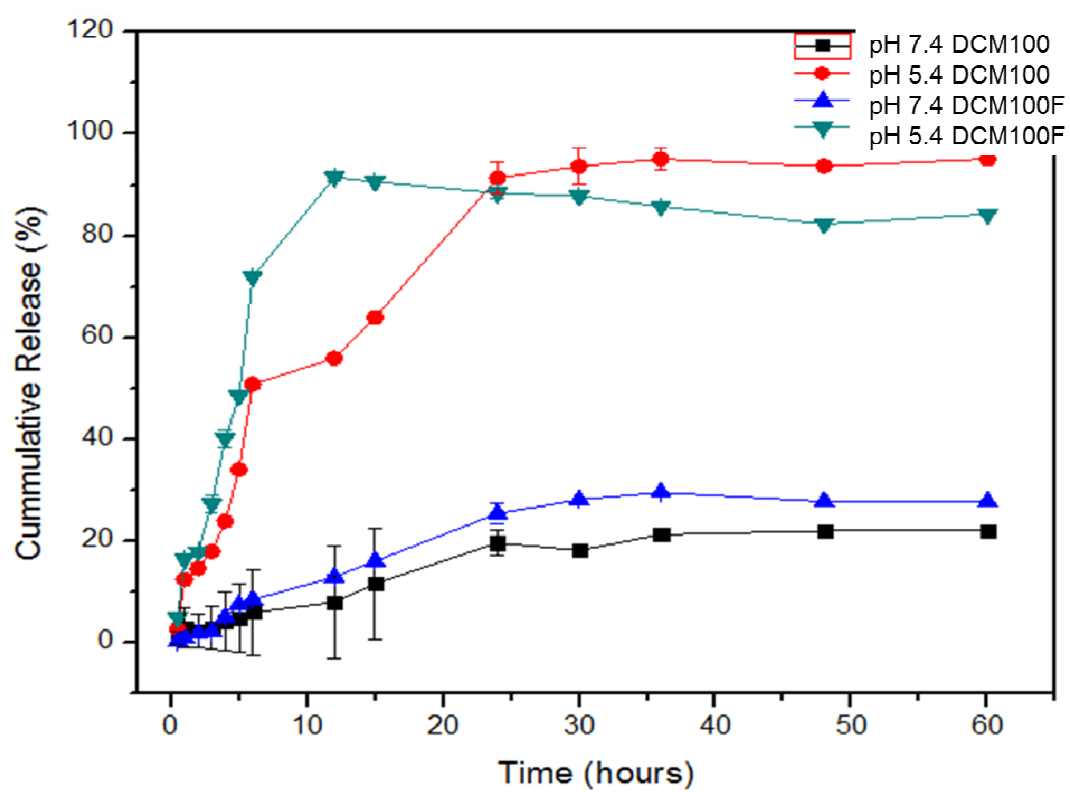

Supplement: s1 [file s1]
